1  
2  
3  
4  
5  
6  
7  
8  
9  
10  
11  
12  
13  
14  
15  
16  
17  
18  
19  
20  
21

## **Silicone Oil-Induced Glaucomatous Neurodegeneration in Rhesus Macaques**

**Ala Moshiri<sup>1,5</sup>, Fang Fang<sup>2,3,5</sup>, Pei Zhuang<sup>2,4</sup>, Haoliang Huang<sup>2</sup>, Xue Feng<sup>2</sup>, Liang Li<sup>2</sup>,  
Roopa Dalal<sup>2</sup>, and Yang Hu<sup>2,\*</sup>**

<sup>1</sup>Department of Ophthalmology & Vision Science, School of Medicine, University of California  
Davis, Sacramento, CA 95817, USA.

<sup>2</sup>Department of Ophthalmology, Stanford University School of Medicine, Palo Alto, CA 94304,  
USA

<sup>3</sup>Department of Ophthalmology, The Second Xiangya Hospital, Central South University,  
Changsha 410011, China

<sup>4</sup>Current address, Janssen Research & Development, South San Francisco, CA 94080, USA

<sup>5</sup>These authors contributed equally.

\* Correspondence and requests for materials should be addressed to Y.H. ([huyang@stanford.edu](mailto:huyang@stanford.edu))

22 **Abstract**

23 **Previously, we developed a simple procedure of intracameral injection of silicone oil (SO)**  
24 **into mouse eyes and established the mouse SOHU (SO-induced ocular hypertension under-**  
25 **detected) glaucoma model with reversible intraocular pressure (IOP) elevation and**  
26 **significant glaucomatous neurodegeneration. Because the anatomy of the non-human**  
27 **primate (NHP) visual system closely resembles that of humans, it is the most likely to predict**  
28 **human responses to diseases and therapies. Here we replicated the SOHU glaucoma model**  
29 **in rhesus macaque monkeys. All six animals that we tested showed significant retinal**  
30 **ganglion cell (RGC) death, optic nerve (ON) degeneration, and visual functional deficits at**  
31 **both 3 and 6 months. In contrast to the mouse SOHU model, IOP changed dynamically in**  
32 **these animals, probably due to individual differences in ciliary body tolerance capability.**  
33 **This acute NHP glaucoma model closely recapitulates the major features of glaucomatous**  
34 **neurodegeneration in humans, and is therefore suitable for studying the pathology of**  
35 **primate RGC/ON, assessing experimental therapies for neuroprotection and regeneration,**  
36 **and therefore for translating relevant findings into novel and effective treatments for**  
37 **patients with glaucoma and other neurodegenerations.**

38

## 39 **Introduction**

40 Glaucoma, the most common cause of irreversible blindness, is characterized by progressive  
41 peripheral to central loss of retinal ganglion cells (RGCs) and their axons in optic nerve (ON)<sup>1-4</sup>.  
42 Although glaucoma can occur at any intraocular pressure (IOP) level<sup>5</sup>, elevated IOP is associated  
43 with accelerated progression<sup>1-4,6,7</sup>. Lowering IOP is the only available treatment but fails to  
44 completely prevent the progression of glaucomatous neurodegeneration<sup>8-11</sup>. Neuroprotectants that  
45 promote RGC/ON survival, transplantation of stem cell-derived RGCs to replace lost RGCs, and  
46 regeneration therapies to stimulate RGC soma and axon regrowth are promising neural repair  
47 strategies to restore vision in glaucoma patients<sup>12,13</sup>. To translate exciting laboratory findings into  
48 effective neuroprotective and regenerative treatments, pre-clinical testing in a disease-relevant,  
49 translation-enabling animal glaucoma model that closely resembles human patients is critically  
50 important.

51

52 We recently developed a silicone oil (SO)-induced ocular hypertension under-detected (SOHU)  
53 glaucoma mouse model<sup>14-16</sup> based on the well-documented, SO-induced human secondary  
54 glaucoma that occurs as a complication of vitreoretinal surgery<sup>17,18</sup>. By blocking aqueous flow to  
55 the anterior chamber with a single intracameral injection of SO that induces pupillary block, this  
56 SO injection causes accumulation of aqueous and significant IOP elevation in the posterior  
57 chamber, and subsequent progressive RGC and ON degeneration. Importantly, the ocular  
58 hypertension of the SOHU model can be reversed quickly and definitively by easily removing SO  
59 from the anterior chamber<sup>14-16</sup>. However, there is a recognized gap in the translation of successful  
60 neuroprotective and regenerative therapies identified in rodent models of glaucoma to treatment  
61 for glaucoma patients. Rodents have known limitations that may impede translation of potential

62 therapeutics: differences in immune system responses, ON head (ONH) architecture, and brain  
63 structures and circuitry may contribute to differences in pathogenesis between rodents and  
64 primates and, therefore, to critically different responses to therapeutics. Despite the many benefits  
65 of the mouse SOHU model, a higher experimental animal species is needed for pre-clinical  
66 translation research.

67

68 The anatomy of the non-human primate (NHP) visual system closely resembles that of humans  
69 and includes a similar distribution of rods and cones, a specialized macula and fovea and lamina  
70 cribrosa not present in rodent, comparable contrast sensitivity and visual acuity, and almost  
71 identical retinocortical architecture <sup>19,20</sup>. An NHP glaucoma model is the most likely to predict  
72 human responses to ocular hypertension and therapies, and the rhesus macaque monkey has been  
73 used successfully in experimental glaucoma research <sup>21,22</sup>. Since SO-induced pupillary block  
74 causes secondary glaucoma in both human patients and mice, we reasoned that the same procedure  
75 may be adapted to different animal species with minimal confounding factors. Here we report the  
76 development of a novel NHP glaucoma model in rhesus macaque monkeys, in which intracameral  
77 SO injection causes severe RGC and ON degeneration and visual function deficits. We expect this  
78 model to be useful for studying primate RGC pathophysiology, assessing experimental  
79 neuroprotective and regenerative therapies, and therefore for translating relevant findings into  
80 novel and effective treatments for patients with glaucoma and other neurodegenerations.

81

82

83

84 **Results**

85 **Intracameral injection of SO in rhesus macaque monkey causes RNFL thinning and**  
86 **decreases PhNR**

87 We injected roughly 100  $\mu$ l SO into the anterior chamber of the right eyes of 6 macaque monkeys  
88 (**Table 1**), filling 80% SO of the anterior chamber with complete covering of the pupil (**Fig. 1A**).  
89 Retinal morphology and function were assayed before SO injection and at different time points  
90 after. These assays included fundus imaging, spectral-domain optical coherence tomography (SD-  
91 OCT), and electroretinography (ERG) (**Fig. 1B**). Thinning of the retina nerve fiber layer (RNFL)  
92 measured by OCT is used clinically as a biomarker for RGC/ON degeneration<sup>23-25</sup>. We measured  
93 the RNFL thickness of the animals and detected edema (thickening) of RNFL in the SOHU eyes  
94 at 3-month post injection (3mpi) and significant thinning at 6mpi (**Fig. 2A,B**), indicating inner  
95 retina neurodegeneration. We also examined the visual function of these macaques. The photopic  
96 negative response (PhNR) of the photopic full-field ERG is a negative-going wave that occurs  
97 after the b-wave in response to a brief flash and reflects the function of RGCs and their axons in  
98 general. Its amplitude is reduced early in human glaucoma<sup>26</sup>, which also correlates well with  
99 structural loss in NHP glaucoma<sup>27</sup>. Both b-wave and PhNR's amplitudes decreased in the SOHU  
100 eyes at all time points after SO injection, but only reached statistical significance at 1mpi (**Fig.**  
101 **2C**), suggesting functional deficits of the inner retina.

102

103 **Significant RGC and ON degeneration of the SOHU eyes at 3mpi and 6mpi in all tested**  
104 **animals**

105 To confirm the glaucomatous neurodegeneration, we euthanized two animals at 3mpi and four  
106 animals at 6mpi for histological analysis of post-mortem retina and ON. Consistent with the *in*

107 *vivo* structural and functional deficits detected in the living animal, retinal wholemounts revealed  
108 significant RGC somata loss in the SOHU eye throughout the peripheral to the central retinas at  
109 both 3mpi and 6mpi (**Fig. 3A,B**); and semithin cross-sections showed significant RGC axon  
110 degeneration in ON at both 3mpi and 6mpi (**Fig. 3C,D**), indicating significant glaucomatous  
111 neurodegeneration of the SOHU eyes.

112

### 113 **Dynamic IOP changes in the SOHU macaque eyes associated with ciliary body atrophy**

114 Surprisingly, these macaques showed different IOP dynamics after SO injection. In two animals  
115 (#44876 and #45513), IOP was elevated immediately after SO injection (15 to 19 mmHg and 13  
116 to 22 mmHg, **Fig. 4A**). Because restrictions of the Primate Center then precluded measuring the  
117 IOPs before 1mpi or more frequently than once a month thereafter, we could not measure the IOP  
118 earlier or more often. Therefore, we do not know for the duration of the transient IOP elevation  
119 after SO injection. However, all six animals showed substantial ocular hypotension at 1mpi and  
120 2mpi: IOPs of the SOHU eyes were much lower than their baselines or their contralateral control  
121 eyes (**Fig. 4A,B**). The ocular hypotension lasted from 1mpi to 3mpi in two animals (#44876 and  
122 #45513) and from 1mpi to 5mpi in one animal (#44639); IOP returned progressively to normal  
123 between 2-6mpi in three animals (#42946, #44639, and #44193) that we maintained for 6 months.  
124 In one animal (#38361) IOP was much higher than normal from 3-5mpi, at first fell significantly  
125 when SO was removed from the eye at 5mpi, then returned to normal one month later. The  
126 sequence of changes in this animal indicated that the SO-induced pupillary blocking was the cause  
127 of IOP elevation, and that simply removing the SO reversed the pupillary blocking and ocular  
128 hypertension. Because we missed the measurement at the 2mpi time point for this animal (#38361),

129 we assume that the IOP of the SOHU eye recovered from ocular hypotension and became elevated  
130 between 1mpi and 3mpi.

131

132 We suspect that the pupillary blockade caused a substantial elevation of the IOP acutely,  
133 which led to ciliary body “shutdown”, as in some human patients<sup>28</sup>. The subsequent lasting ocular  
134 hypotony then happened due to ceased aqueous production from ciliary body. Indeed, the ciliary  
135 body was severely atrophied in the SOHU eyes of all animals, revealed by H&E staining of the  
136 anterior segments of the eyes (**Fig. 5** and **Supplementary Figure 1A**). There was no inflammation  
137 or obvious deformation of cornea, sclera, iris, or lens, although the pupils of the SOHU eyes were  
138 fixed in the mid-dilated state (**Supplementary Figure 1B**), suggesting a transient high IOP  
139 elevation, which may result in ischemic iris sphincter muscle and consequently limitation in  
140 constriction, as in patients with acute angle closure glaucoma<sup>29</sup>.

141

#### 142 **ON head “cupping” is present in the SOHU eye with persistent IOP elevation**

143 A characteristic morphological feature of human glaucoma is enlargement of the depression in the  
144 center of the ONH, called glaucomatous “cupping”<sup>30,31</sup>. Strikingly, live fundus imaging with  
145 confocal scanning laser ophthalmoscopy (cSLO) readily detected this signature morphological  
146 change of glaucoma in the SOHU macaque eye (#38361) by at 3 and 5mpi (**Fig. 6A**),  
147 corresponding to IOP elevation (**Fig. 4**). That ONH cupping is absent in the mouse SOHU model  
148 further confirms the similarity between macaque and human eyes. This characteristic  
149 glaucomatous optic cup enlargement was even more obvious in OCT live imaging by radial B-  
150 scan centered through the ONH (**Fig. 6B**). Based on previously developed measurement of the

151 anatomic features of the macaque ONH <sup>31,32</sup>, we applied the Visualization Toolkit (VTK) to  
152 reconstruct and delineate the OCT imaging data (**Supplementary Figure 2A**). We used inner  
153 limiting membrane (ILM), Bruch’s membrane opening (BMO), the two discrete points at either  
154 side of the neural canal, and the BMO reference plane as references to acquire minimum rim width  
155 (MRW), rim volume (RimV), and cup volume (CupV). Obvious shortening of MRW, shrinking  
156 of RimV, and enlarging of CupV were detected in the SOHU eye compared to contralateral control  
157 eye (**Supplementary Figure 2B**). The H&E staining of the ONH confirmed the “cupping”  
158 phenotype and significant thinning of RNFL (**Supplementary Figure 2C-E**). The lamina cribrosa  
159 is a trabecular connective tissue to support RGC axons at the ONH <sup>33</sup>. Its deformation, such as  
160 increased curve and depth, may correlate with RNFL thinning in glaucoma patients <sup>34,35</sup>.  
161 Interestingly, collagen staining of the ONH of the SOHU eye also showed lamina cribrosa bowing  
162 (**Supplementary Figure 2D**). ONH “cupping” cannot be found by fundus SLO images or OCT  
163 images in the eyes of the other macaques without persistent IOP elevation (**Supplementary Figure**  
164 **3A,B**), indicating the correlation of prolonged ocular hypertension and ONH “cupping”.

165

166



167 **Discussion**

168 The present report establishes a straightforward and minimally invasive procedure, a single  
169 intracameral injection of SO, to induce reproducible glaucomatous RGC and ON degeneration  
170 within 3-6 months in rhesus macaque monkeys. The model mimics acute secondary glaucoma  
171 caused by pupillary blocking and can be used to study the pathogenesis of neurodegeneration and  
172 to select urgently needed neuroprotectants and regeneration therapies that are unrelated to IOP  
173 management. Within 3-6 months of a simple SO intracameral injection, the SOHU eyes of all  
174 monkeys studied showed a highly consistent array of findings: significant thinning of RNFL,  
175 decreased visual function (PhNR), and loss of RGC somata and axons. The reversible intracameral  
176 SO injection does not cause overt anterior ocular structural damage other than the ciliary body  
177 while simulating acute glaucomatous RGC and ON changes. Therefore, this inducible,  
178 reproducible, and clinically relevant NHP neurodegeneration model can be used to decipher the  
179 molecular mechanisms of transient ocular hypertension-induced glaucomatous degeneration in  
180 primate, and to preclinically assess the efficacy and safety of experimental strategies for  
181 neuroprotection and regeneration.

182

183 A unique feature of this NHP model is the transient IOP elevation-induced ciliary body “shock”.  
184 Unlike mouse, but as can happen in humans <sup>28</sup>, the NHP ciliary body seems very vulnerable to  
185 acutely elevated IOP, which first caused it to stop generating aqueous humor and ocular  
186 hypotension, and ultimately leads to atrophy. All six monkeys that we tested consistently  
187 developed persistent intraocular hypotension and histological evidence of ciliary body atrophy,  
188 although we captured the initial transient IOP elevation before ocular hypotension in only two  
189 animals. Unfortunately, most animals (five out of six monkeys) studied did not fully recover

190 normal ciliary body function. Ciliary body function appeared to recover in part, however, since  
191 they became able to maintain low or normal IOP in the presence of SO-induced pupillary blocking  
192 within the time period of the experiment (3-6 months). Despite the absence of long-lasting chronic  
193 ocular hypertension, all five animals showed similar RGC and ON degeneration as the one animal  
194 with persistent ocular hypertension. This suggests that transient acute IOP elevation causes the  
195 neurodegeneration. From our mouse study <sup>16</sup>, we learned that although SO removal allows IOP to  
196 return quickly to normal, it does not stop the progression of glaucomatous neurodegeneration in  
197 the SOHU model. This result is also consistent with the clinical observation that visual field loss  
198 can progress aggressively in some glaucoma patients whose IOP is maintained at a relatively low  
199 level. Thus, this NHP SOHU model can be used to determine the efficacy of experimental  
200 neuroprotection treatment when IOP is low after an initial period of pathogenic ocular  
201 hypertension, simulating clinical IOP treatment. Advanced retinal imaging and visual function  
202 assays that are available for humans can be applied to this primate glaucoma model. These assays  
203 will identify morphological and functional changes in RGCs and ON that can serve as potential  
204 biomarkers in glaucoma and other optic neuropathies. Since optic neuropathy can also be  
205 associated with other central nervous system (CNS) neurodegenerative diseases <sup>36</sup>, including  
206 multiple sclerosis <sup>23,37,38</sup>, Alzheimer's disease <sup>39,40</sup>, and amyotrophic lateral sclerosis <sup>41,42</sup>, this  
207 model may be broadly applicable to diverse CNS degenerative diseases.

208

209 One animal (#38361) was able to recover rather quickly from ciliary body shock and resume  
210 adequate aqueous humor production, which increased IOP due to pupillary blocking. It is notable  
211 that the characteristic glaucomatous ONH “cupping” was associated with persistent ocular  
212 hypertension in this animal but absent from the other animals without persistent IOP elevation.

213 Ocular vascular dysfunction has long been known to be correlated with the incidence of glaucoma  
214 and acutely elevated IOP in patients with angle-closure glaucoma, and secondary glaucoma can  
215 induce central retinal artery occlusion with ischemic damage of the inner retina<sup>43-46</sup>. We previously  
216 detected ocular ischemia with inner retina damage and outer retina sparing in the severe variant of  
217 the SOHU mouse model<sup>16</sup>, consistent with findings in rats with acutely elevated IOP<sup>47-50</sup>.  
218 Interestingly, we also detected branch retinal artery occlusion in the animal (#38361) with elevated  
219 IOP, demonstrating another similarity between the ocular hypertension in NHP and the human  
220 acute glaucoma-related syndrome. We do not know what causes the variable ciliary body  
221 responses of different animals. Age may play a role since #38361 was much older (13yrs) than the  
222 other five animals (6-8yrs); the middle-aged ciliary body in this animal may be more resilient than  
223 younger ciliary bodies. Further systematic studies with additional senior, middle-aged, and young  
224 NHP animals are needed to clarify the reasons and to further optimize this model. For example, a  
225 modified SOHU model like the one that we developed in mouse that induces and maintains a  
226 moderate elevation of IOP through frequent pupil dilation<sup>16</sup> may prevent the acute severe IOP  
227 elevation causing ciliary body shock.

228

229

230 **Methods**

231 **Animal.** The animals in this study were rhesus macaques (*Macaca mulatta*) born and maintained  
232 at the California National Primate Research Center (CNPRC). The CNPRC is accredited by the  
233 Association for Assessment and Accreditation of Laboratory Animal Care (AAALAC)  
234 International. Guidelines of the Association for Research in Vision and Ophthalmology Statement  
235 for the Use of Animals in Ophthalmic and Vision Research were followed. All aspects of this study  
236 were in accordance with the National Institutes of Health (NIH) Guide for the Care and Use of  
237 Laboratory Animals and all methods are reported in accordance with ARRIVE guidelines.  
238 Phenotyping and ophthalmic examinations were performed according to an animal protocol  
239 approved by the University of California Davis Institutional Animal Care and Use Committee and  
240 Stanford University School of Medicine.

241  
242 **Intracameral injection of SO.** The procedure is similar to the published protocol<sup>14,15</sup> but with  
243 modification for monkey eyes. Sedation was achieved by intramuscular injection of ketamine  
244 hydrochloride (5-30 mg/kg IM) and dexmedetomidine (0.05-0.075 mg/kg IM). The eyes were  
245 prepped in a usual sterile fashion for ophthalmic surgery including topical anesthetic 0.5%  
246 proparacaine hydrochloride (Akorn, Somerset, New Jersey) followed by 5% betadine to the ocular  
247 surface and adnexa. A disposable 15-degree blade was used to make a side-port incision at the  
248 corneal limbus to enter the anterior chamber inferiorly near the 6 o'clock position in order to  
249 minimize the likelihood of oil leaking out of the eye. Silicone oil (SO, 1,000 mPa.s, Silikon, Alcon  
250 Laboratories, Fort Worth, Texas) in a 3 cc syringe on a bent 25 gauge cannula was introduced into  
251 the anterior chamber. SO was injected little by little, stopping intermittently with gentle pressure  
252 applied to the posterior aspect of the limbal incision to allow for aqueous humor to exit the eye.

253 Oil was injected to fill the anterior chamber to a physiologic depth with roughly ~70-80% silicone  
254 oil and to cover the entire pupil with ~ 100 µl volume. After the injection, the wound was tested  
255 to insure it was self-sealing and veterinary antibiotic ointment (BNP Ophthalmic Ointment,  
256 Vetropolycin, Dechra, Overland Park, Kansas) was applied to the surface of the injected eye. The  
257 contralateral control eyes received a mock injection with no penetration of the eye. Animals were  
258 monitored by a trained technician and a veterinarian at all times.

259

260 **Removing SO from the anterior chamber.** The procedure is similar to the published protocol  
261 <sup>14,15</sup> with modification for monkey eyes. Briefly, after the animal was anesthetized the eye was  
262 prepped in a sterile fashion as above. A superior (12 o'clock) corneal side-port incision was made  
263 using a 15-degree blade at the corneal limbus. A 3 cc syringe filled with sterile balanced salt  
264 solution (BSS Plus, Alcon Laboratories, Ft. Worth, Texas) with a 25 gauge bent cannula was  
265 introduced into the anterior chamber and saline was gently injected little by little while periodically  
266 allowing oil to egress from the same incision by gently applying pressure to the posterior aspect  
267 of the wound. After removing all of the oil and replacing it incrementally with BSS to a physiologic  
268 depth, the cannula was removed and the wound was checked to be self-sealing, after which  
269 antibiotic ointment was applied.

270

271 **Eye examinations and retinal fundus imaging.** Sedated ophthalmic examination included  
272 measurement of intraocular pressure (IOP) using rebound tonometry (Icare TA01i, Finland) while  
273 the animal was held upright and with careful attention not to apply any pressure to the globe. Three  
274 IOP measurements were taken and averaged at each exam date. Examination also included  
275 pupillary light reflex testing, external and portable slit lamp examination, as well as dilated

276 (Tropicamide 1%, Phenylephrine 2.5%, Cyclopentolate 1%) indirect ophthalmoscopy. Sedation  
277 was achieved by intramuscular injection of ketamine hydrochloride (5-30 mg/kg IM) and  
278 dexmedetomidine (0.05-0.075 mg/kg IM). Animals were monitored by a trained technician and a  
279 veterinarian at all times. Color and red-free fundus photographs were obtained with the CF-1  
280 Retinal Camera with a 50° wide angle lens (Canon, Tokyo, Japan).

281  
282 **Spectral-domain optical coherence tomography (SD-OCT) imaging.** SD-OCT with confocal  
283 scanning laser ophthalmoscopy (cSLO) was also performed (Spectralis® HRA+OCT, Heidelberg,  
284 Germany). High-resolution radial and circumferential scans centered on the optic nerve were  
285 obtained using a corneal curvature (K) value of 6.5 mm radius. For the high-resolution radial scans  
286 of the optic nerve head (ONH), 48 radial B-scans were acquired by 870 nm SD-OCT (Spectralis;  
287 Heidelberg Engineering, GmbH), over a 30° area, and 768 A-scans per B-scan at ART=16  
288 repetitions. All repetitive scans were acquired using eye-tracking and averaged to reduce speckle  
289 noise. We read in all the images and measured MRW, RimV, and CupV using R program. The  
290 codes that we used to calculate MRW, RimV and CupV are at Github ([https://github.com/HuLab-](https://github.com/HuLab-Code/ONHV)  
291 [Code/ONHV](https://github.com/HuLab-Code/ONHV)). For each monkey eye, the center of the ONH was estimated and registered during  
292 the first imaging session and used to align all follow-up images. All imaging was done by the  
293 same ophthalmic imaging team. All OCT images were taken through the center of the pupil.  
294 Speculums were used and corneal hydration was maintained through application of topical  
295 lubrication (Gentle artificial tears) approximately every 1-2 minutes during imaging sessions.  
296 The en-face retinal images were captured with the Heidelberg Spectralis SLO/OCT system  
297 equipped with an 870nm infrared wavelength light source and a 30° lens (Heidelberg  
298 Engineering). The average thickness of retinal nerve fiber layer (RNFL) around the optic nerve

299 head was measured manually with the aid of Heidelberg software. The investigators who  
300 measured the thickness of RNFL were masked to the treatment of the samples.

301  
302 **Electroretinography (ERG) recording.** After dilation, a full-field ERG (ffERG) containing six  
303 different tests was performed on each eye following a 30-minute dark adaptation period. ERG-Jet  
304 electrodes (item #95-011) were coupled with the RETeval instrument (LKC Technologies,  
305 Gaithersburg, MD, United States), as previously described<sup>51</sup>. A standard flash electroretinogram  
306 was performed according to the approved protocol of the International Society for Clinical  
307 Electrophysiology of Vision (ISCEV). There were four dark adapted tests (0.01 cd\*s/m<sup>2</sup>, 3.0  
308 cd\*s/m<sup>2</sup>, 10.0 cd\*s/m<sup>2</sup>, and oscillatory potentials 3.0 cd\*s/m<sup>2</sup>). After 10 minutes of light  
309 adaptation, two additional tests were performed (3.0 cd\*s/m<sup>2</sup> single flash with measurement of  
310 the photopic negative response and photopic flicker 3.0 cd\*s/m<sup>2</sup>). Both time (ms) and amplitude  
311 ( $\mu$ V) were obtained for each test on each eye. Single flash tests measured an a-wave and b-wave.  
312 Oscillatory potentials measured five wave points and a sum. In the photopic flicker test, the first  
313 wave point is reported. Measurements were recorded and displayed using the manufacturer's  
314 software.

315  
316 **Immunohistochemistry of whole-mount retina and RGC counting.** The detailed procedure has  
317 been published before<sup>14,15,52</sup> with modification to accommodate large monkey eyes. Briefly, after  
318 intravitreal injection with 10% formalin in PBS, the eyes and optic nerves were dissected out, post-  
319 fixed with 10% formalin for 24 hours at room temperature. Retinas were dissected out and washed  
320 extensively in PBS before blocking in staining buffer (10% normal goat serum, Sigma-Aldrich,  
321 and 2% Triton X-100 in PBS) for half an hour. RBPMS guinea pig antibody made at ProSci Inc

322 (Poway, California) according to publications<sup>53,54</sup> was diluted (1:4000) in the same staining buffer.  
323 Floating retinas were incubated with primary antibodies overnight at 4°C and washed 3 times for  
324 30 minutes each with PBS. Secondary antibodies (Cy3) were then applied (1:200; Jackson  
325 ImmunoResearch, West Grove, Pennsylvania) and incubated for 1 hour at room temperature.  
326 Retinas were again washed 3 times for 30 minutes each with PBS before a cover slip was attached  
327 with Fluoromount-G (SouthernBiotech, Birmingham, Alabama). For RGC counting, whole-mount  
328 retinas were immunostained with the RBPMS antibody, 6 fields sampled from each region  
329 (periphery, mid-periphery, and center retinas) using a 20x lens with Keyence epifluorescence  
330 microscope, and RBPMS<sup>+</sup> RGCs of each image (540 µm x 720 µm) were counted manually with  
331 Fiji/ImageJ. The investigators who counted the cells were masked to the treatment of the samples.

332

333 **ON semi-thin sections and quantification of surviving axons.** The detailed procedure has been  
334 published before<sup>14,15,52</sup>. Briefly, the ON was exposed by removing the brain and post-fixed *in situ*  
335 using 2% glutaraldehyde/ 2% PFA in 0.1M PB for 4 hours on ice. Samples were then washed with  
336 0.1M PB 3 times, 10 minutes each wash. The ONs were then carefully dissected out and rinsed  
337 with 0.1M PB 3 times, 10 minutes each wash. They were then incubated in 1% osmium tetroxide  
338 in 0.1M PB for 1 hour at room temperature followed by washing with 0.1M PB for 10 minutes and  
339 water for 5 minutes. ONs were next dehydrated through graded ethanol, infiltrated in propylene  
340 oxide and epoxy, and embedded in epoxy at 60°C for 24 hours. Semi-thin sections (1 µm) were  
341 cut on an ultramicrotome (EM UC7, Leica) and collected 2 mm distal to the eye. The semi-thin  
342 sections were attached to glass slides and stained with 1% para-phenylenediamine (PPD) in  
343 methanol: isopropanol (1:1) for 35 minutes. After rinsing 3 times with methanol: isopropanol (1:1),  
344 coverslips were applied with Permount Mounting Medium (Electron Microscopy Sciences,



345 Hatfield, Pennsylvania). PPD stains all myelin sheaths, but darkly stains the axoplasm only of  
346 degenerating axons, which allows us to differentiate surviving axons from degenerating axons<sup>55</sup>.  
347 The whole ON were imaged with a 100x lens of a Keyence fluorescence microscopy to cover the  
348 entire area of the ON without overlap. Four areas of 108  $\mu\text{m}$  x 144  $\mu\text{m}$  were cropped, and the  
349 surviving axons within the designated areas counted manually with Fiji/ImageJ. After counting all  
350 the images taken from a single nerve, the mean of the surviving axon number was calculated for  
351 each ON. The investigators who counted the axons were masked to the treatment of the samples.

352  
353 **Anterior segments and retina cross sections and H&E and Trichrome Staining.** Monkey eyes  
354 were enucleated and immediately fixed in 10% formalin for 36 hours at room temperature. They  
355 were processed through graded alcohol and xylene, then infiltrated and embedded in paraffin. Six-  
356 micron sections were taken and stained with Hematoxylin & Eosin (H&E) to look at the cell nuclei,  
357 extracellular matrix, and cytoplasm using Nikon Eclipse (E800) microscope. Standard protocol  
358 was followed to stain these slides. The Trichrome kit was purchased from Abcam (ab 150686) to  
359 study collagenous connective tissue in sections. Slides were deparaffinized and incubated in  
360 preheated Bouin's fluid for an hour and rinsed in water. They were then incubated in Weigert's  
361 Iron Hematoxylin for 5 minutes, rinsed in water again and then incubated in Biebrich Scarlet/Acid  
362 Fuchsin solution for 15 minutes. They were rinsed in water again. Sections were then differentiated  
363 in phosphotungstic acid solution for 10-15 minutes (or until collagen is not red), incubated in  
364 Aniline Blue solution for 5-10 minutes and rinsed in water. Acetic acid solution was applied to  
365 these sections for 3-5 minutes, and slides were then dehydrated in alcohol, cleared in xylene, and  
366 mounted with CytoSeal 60 (from Electron Microscopy Sciences, 18006). This stain shows a  
367 stronger collagen stain (blue green stain) in glaucomatous eye than the control eye.

368

369 **Statistical analyses.** GraphPad Prism 7 was used to generate graphs and for statistical analyses.

370 Data are presented as means  $\pm$  s.e.m. Student's t-test was used for two groups comparison and

371 One-way ANOVA with post hoc test was used for multiple comparisons.

372

373 **Data availability**

374 All data generated or analyzed during this study are included in this published article (and its

375 Supplementary Information files).

## 376 References

- 377
- 378
- 379 1 Howell, G. R. *et al.* Axons of retinal ganglion cells are insulted in the optic nerve early in DBA/2J  
380 glaucoma. *J Cell Biol* **179**, 1523-1537, doi:10.1083/jcb.200706181 (2007).
- 381 2 Tham, Y. C. *et al.* Global prevalence of glaucoma and projections of glaucoma burden through 2040: a  
382 systematic review and meta-analysis. *Ophthalmology* **121**, 2081-2090, doi:10.1016/j.ophtha.2014.05.013  
383 (2014).
- 384 3 Weinreb, R. N. *et al.* Primary open-angle glaucoma. *Nat Rev Dis Primers* **2**, 16067,  
385 doi:10.1038/nrdp.2016.67 (2016).
- 386 4 Calkins, D. J. Adaptive responses to neurodegenerative stress in glaucoma. *Prog Retin Eye Res*, 100953,  
387 doi:10.1016/j.preteyeres.2021.100953 (2021).
- 388 5 Iyer, J., Vianna, J. R., Chauhan, B. C. & Quigley, H. A. Toward a new definition of glaucomatous optic  
389 neuropathy for clinical research. *Curr Opin Ophthalmol* **31**, 85-90, doi:10.1097/ICU.0000000000000644  
390 (2020).
- 391 6 Burgoyne, C. F. A biomechanical paradigm for axonal insult within the optic nerve head in aging and  
392 glaucoma. *Experimental eye research* **93**, 120-132, doi:10.1016/j.exer.2010.09.005 (2011).
- 393 7 Calkins, D. J. Critical pathogenic events underlying progression of neurodegeneration in glaucoma. *Prog*  
394 *Retin Eye Res* **31**, 702-719, doi:10.1016/j.preteyeres.2012.07.001 (2012).
- 395 8 Heijl, A. *et al.* Reduction of intraocular pressure and glaucoma progression: results from the Early Manifest  
396 Glaucoma Trial. *Arch Ophthalmol* **120**, 1268-1279, doi:10.1001/archophth.120.10.1268 (2002).
- 397 9 Garway-Heath, D. F. *et al.* Latanoprost for open-angle glaucoma (UKGTS): a randomised, multicentre,  
398 placebo-controlled trial. *Lancet* **385**, 1295-1304, doi:10.1016/S0140-6736(14)62111-5 (2015).
- 399 10 Anderson, D. R. & Normal Tension Glaucoma, S. Collaborative normal tension glaucoma study. *Curr Opin*  
400 *Ophthalmol* **14**, 86-90, doi:10.1097/00055735-200304000-00006 (2003).
- 401 11 Wormald, R., Virgili, G. & Azuara-Blanco, A. Systematic reviews and randomised controlled trials on  
402 open angle glaucoma. *Eye (Lond)* **34**, 161-167, doi:10.1038/s41433-019-0687-5 (2020).
- 403 12 Wareham, L. K., Risner, M. L. & Calkins, D. J. Protect, Repair, and Regenerate: Towards Restoring Vision  
404 in Glaucoma. *Curr Ophthalmol Rep* **8**, 301-310, doi:10.1007/s40135-020-00259-5 (2020).
- 405 13 Beykin, G., Norcia, A. M., Srinivasan, V. J., Dubra, A. & Goldberg, J. L. Discovery and clinical translation  
406 of novel glaucoma biomarkers. *Prog Retin Eye Res* **80**, 100875, doi:10.1016/j.preteyeres.2020.100875  
407 (2021).
- 408 14 Zhang, J. *et al.* Silicone oil-induced ocular hypertension and glaucomatous neurodegeneration in mouse.  
409 *eLife* **8**, doi:10.7554/eLife.45881 (2019).
- 410 15 Zhang, J. *et al.* A Reversible Silicon Oil-Induced Ocular Hypertension Model in Mice. *Journal of*  
411 *visualized experiments : JoVE* **153**, doi:10.3791/60409 (2019).
- 412 16 Fang, F. *et al.* Chronic mild and acute severe glaucomatous neurodegeneration derived from silicone oil-  
413 induced ocular hypertension. *Scientific reports* **11**, 9052, doi:10.1038/s41598-021-88690-x (2021).
- 414 17 Ichhpujani, P., Jindal, A. & Jay Katz, L. Silicone oil induced glaucoma: a review. *Graefe's archive for*  
415 *clinical and experimental ophthalmology = Albrecht von Graefes Archiv fur klinische und experimentelle*  
416 *Ophthalmologie* **247**, 1585-1593, doi:10.1007/s00417-009-1155-x (2009).
- 417 18 Kornmann, H. L. & Gedde, S. J. Glaucoma management after vitreoretinal surgeries. *Curr Opin*  
418 *Ophthalmol* **27**, 125-131, doi:10.1097/ICU.0000000000000238 (2016).
- 419 19 Harwerth, R. S. & Smith, E. L., 3rd. Rhesus monkey as a model for normal vision of humans. *Am J Optom*  
420 *Physiol Opt* **62**, 633-641, doi:10.1097/00006324-198509000-00009 (1985).
- 421 20 Chen, L., Zhao, Y. & Zhang, H. Comparative Anatomy of the Trabecular Meshwork, the Optic Nerve Head  
422 and the Inner Retina in Rodent and Primate Models Used for Glaucoma Research. *Vision (Basel)* **1**,  
423 doi:10.3390/vision1010004 (2016).
- 424 21 Burgoyne, C. The morphological difference between glaucoma and other optic neuropathies. *Journal of*  
425 *neuro-ophthalmology : the official journal of the North American Neuro-Ophthalmology Society* **35 Suppl**  
426 **1**, S8-S21, doi:10.1097/WNO.0000000000000289 (2015).
- 427 22 Burgoyne, C. F. The non-human primate experimental glaucoma model. *Experimental eye research* **141**,  
428 57-73, doi:10.1016/j.exer.2015.06.005 (2015).
- 429 23 Balcer, L. J., Miller, D. H., Reingold, S. C. & Cohen, J. A. Vision and vision-related outcome measures in  
430 multiple sclerosis. *Brain* **138**, 11-27, doi:10.1093/brain/awu335 (2015).

- 431 24 Aktas, O., Albrecht, P. & Hartung, H. P. Optic neuritis as a phase 2 paradigm for neuroprotection therapies  
432 of multiple sclerosis: update on current trials and perspectives. *Current opinion in neurology* **29**, 199-204,  
433 doi:10.1097/WCO.0000000000000327 (2016).
- 434 25 Costello, F. *et al.* Quantifying axonal loss after optic neuritis with optical coherence tomography. *Annals of*  
435 *neurology* **59**, 963-969, doi:10.1002/ana.20851 (2006).
- 436 26 Viswanathan, S., Frishman, L. J., Robson, J. G., Harwerth, R. S. & Smith, E. L., 3rd. The photopic negative  
437 response of the macaque electroretinogram: reduction by experimental glaucoma. *Invest Ophthalmol Vis*  
438 *Sci* **40**, 1124-1136 (1999).
- 439 27 Wilsey, L. *et al.* Comparing three different modes of electroretinography in experimental glaucoma:  
440 diagnostic performance and correlation to structure. *Documenta ophthalmologica. Advances in*  
441 *ophthalmology* **134**, 111-128, doi:10.1007/s10633-017-9578-x (2017).
- 442 28 Coleman, D. J. Evaluation of ciliary body detachment in hypotony. *Retina* **15**, 312-318,  
443 doi:10.1097/00006982-199515040-00008 (1995).
- 444 29 Flores-Sanchez, B. C. & Tatham, A. J. Acute angle closure glaucoma. *Br J Hosp Med (Lond)* **80**, C174-  
445 C179, doi:10.12968/hmed.2019.80.12.C174 (2019).
- 446 30 Lockwood, H. *et al.* Lamina cribrosa microarchitecture in normal monkey eyes part 1: methods and initial  
447 results. *Invest Ophthalmol Vis Sci* **56**, 1618-1637, doi:10.1167/iovs.14-15967 (2015).
- 448 31 Yang, H. *et al.* The connective tissue phenotype of glaucomatous cupping in the monkey eye - Clinical and  
449 research implications. *Prog Retin Eye Res* **59**, 1-52, doi:10.1016/j.preteyeres.2017.03.001 (2017).
- 450 32 He, L. *et al.* Longitudinal detection of optic nerve head changes by spectral domain optical coherence  
451 tomography in early experimental glaucoma. *Invest Ophthalmol Vis Sci* **55**, 574-586, doi:10.1167/iovs.13-  
452 13245 (2014).
- 453 33 Downs, J. C. & Girkin, C. A. Lamina cribrosa in glaucoma. *Curr Opin Ophthalmol* **28**, 113-119,  
454 doi:10.1097/ICU.0000000000000354 (2017).
- 455 34 Hopkins, A. A. *et al.* The role of lamina cribrosa tissue stiffness and fibrosis as fundamental biomechanical  
456 drivers of pathological glaucoma cupping. *Am J Physiol Cell Physiol* **319**, C611-C623,  
457 doi:10.1152/ajpcell.00054.2020 (2020).
- 458 35 Kim, J. A. *et al.* Lamina Cribrosa Morphology Predicts Progressive Retinal Nerve Fiber Layer Loss In  
459 Eyes with Suspected Glaucoma. *Scientific reports* **8**, 738, doi:10.1038/s41598-017-17843-8 (2018).
- 460 36 Carelli, V., La Morgia, C., Ross-Cisneros, F. N. & Sadun, A. A. Optic neuropathies: the tip of the  
461 neurodegeneration iceberg. *Hum Mol Genet* **26**, R139-R150, doi:10.1093/hmg/ddx273 (2017).
- 462 37 Toosy, A. T., Mason, D. F. & Miller, D. H. Optic neuritis. *Lancet neurology* **13**, 83-99, doi:10.1016/S1474-  
463 4422(13)70259-X (2014).
- 464 38 Talman, L. S. *et al.* Longitudinal study of vision and retinal nerve fiber layer thickness in multiple  
465 sclerosis. *Annals of neurology* **67**, 749-760, doi:10.1002/ana.22005 (2010).
- 466 39 McKinnon, S. J. Glaucoma: ocular Alzheimer's disease? *Front Biosci* **8**, s1140-1156 (2003).
- 467 40 Chiasseu, M. *et al.* Tau Accumulation, Altered Phosphorylation, and Missorting Promote  
468 Neurodegeneration in Glaucoma. *J Neurosci* **36**, 5785-5798, doi:10.1523/JNEUROSCI.3986-15.2016  
469 (2016).
- 470 41 Minegishi, Y., Nakayama, M., Iejima, D., Kawase, K. & Iwata, T. Significance of optineurin mutations in  
471 glaucoma and other diseases. *Prog Retin Eye Res* **55**, 149-181, doi:10.1016/j.preteyeres.2016.08.002  
472 (2016).
- 473 42 Wiggs, J. L. & Pasquale, L. R. Genetics of glaucoma. *Hum Mol Genet* **26**, R21-R27,  
474 doi:10.1093/hmg/ddx184 (2017).
- 475 43 Mozaffarieh, M., Grieshaber, M. C. & Flammer, J. Oxygen and blood flow: players in the pathogenesis of  
476 glaucoma. *Mol Vis* **14**, 224-233 (2008).
- 477 44 Wareham, L. K. & Calkins, D. J. The Neurovascular Unit in Glaucomatous Neurodegeneration. *Front Cell*  
478 *Dev Biol* **8**, 452, doi:10.3389/fcell.2020.00452 (2020).
- 479 45 Flammer, J. *et al.* The impact of ocular blood flow in glaucoma. *Prog Retin Eye Res* **21**, 359-393,  
480 doi:10.1016/s1350-9462(02)00008-3 (2002).
- 481 46 Osborne, N. N. *et al.* Retinal ischemia: mechanisms of damage and potential therapeutic strategies. *Prog*  
482 *Retin Eye Res* **23**, 91-147, doi:10.1016/j.preteyeres.2003.12.001 (2004).
- 483 47 Smith, G. G. & Baird, C. D. Survival time of retinal cells when deprived of their blood supply by increased  
484 intraocular pressure. *American journal of ophthalmology* **35**, 133-136, doi:10.1016/0002-9394(52)90266-3  
485 (1952).

486 48 Buchi, E. R., Suivaizdis, I. & Fu, J. Pressure-induced retinal ischemia in rats: an experimental model for  
487 quantitative study. *Ophthalmologica* **203**, 138-147, doi:10.1159/000310240 (1991).  
488 49 Hughes, W. F. Quantitation of ischemic damage in the rat retina. *Experimental eye research* **53**, 573-582,  
489 doi:10.1016/0014-4835(91)90215-z (1991).  
490 50 Chidlow, G., Holman, M. C., Wood, J. P. & Casson, R. J. Spatiotemporal characterization of optic nerve  
491 degeneration after chronic hypoperfusion in the rat. *Invest Ophthalmol Vis Sci* **51**, 1483-1497,  
492 doi:10.1167/iovs.09-4603 (2010).  
493 51 Lin, K. H. *et al.* Advanced Retinal Imaging and Ocular Parameters of the Rhesus Macaque Eye.  
494 *Translational vision science & technology* **10**, 7, doi:10.1167/tvst.10.6.7 (2021).  
495 52 Li, L. *et al.* Longitudinal Morphological and Functional Assessment of RGC Neurodegeneration After  
496 Optic Nerve Crush in Mouse. *Frontiers in cellular neuroscience* **14**, 109, doi:10.3389/fncel.2020.00109  
497 (2020).  
498 53 Kwong, J. M., Caprioli, J. & Piri, N. RNA binding protein with multiple splicing: a new marker for retinal  
499 ganglion cells. *Invest Ophthalmol Vis Sci* **51**, 1052-1058, doi:10.1167/iovs.09-4098 (2010).  
500 54 Rodriguez, A. R., de Sevilla Muller, L. P. & Brecha, N. C. The RNA binding protein RBPMS is a selective  
501 marker of ganglion cells in the mammalian retina. *The Journal of comparative neurology* **522**, 1411-1443,  
502 doi:10.1002/cne.23521 (2014).  
503 55 Smith, R. S. *Systematic evaluation of the mouse eye : anatomy, pathology, and biomethods.* (CRC Press,  
504 2002).  
505  
506

507 **Acknowledgements**

508 We thank Drs. Jeffrey Goldberg, Jie Zhang, Xin Duan, Derek Welsbie, Anna La Torre Vila, and  
509 Alan Tessler for critical discussion. Y.H. is supported by CNPRC Pilot Grant, NIH grants  
510 EY031063, EY024932, EY023295, EY028106, and EY032518, and grants from Glaucoma  
511 Research Foundation (CFC3), BrightFocus Foundation, Chan Zuckerberg Initiative  
512 Neurodegeneration Collaborative Pairs Pilot Projects, Stanford SPARK program, and Stanford  
513 Center for Optic Disc Drusen. We are grateful for an unrestricted grant from Research to Prevent  
514 Blindness and NEI P30 EY026877 to the Department of Ophthalmology, Stanford University.

515

516 **Author contributions:** Y.H., A.M., and F.F. designed the experiments. A.M. performed surgeries  
517 and eye exams, F.F., P.Z., H.H., X.F., L.L., and R.D. processed the samples. Y.H., F.F., and A.M.  
518 analyzed the data and prepared the manuscript.

519

520 **Conflict-of-interest statement**

521 YH is a consultant for Janssen BioPharma, Inc. A patent application has been submitted by  
522 Stanford Office of Technology Licensing for SOHU animal glaucoma model that is related to this  
523 manuscript. The authors have declared that no conflict of interest exists.

524

525 **Figure Legends**

526

527 **Table 1. Animal Information**

| <b>ID</b>    | <b>Sex</b> | <b>Date of Birth</b>          | <b>Weight (Kg)</b> |
|--------------|------------|-------------------------------|--------------------|
| <b>38361</b> | <b>F</b>   | <b>05/10/2007<br/>(13yrs)</b> | <b>9.68</b>        |
| <b>42946</b> | <b>F</b>   | <b>05/31/2012<br/>(8yrs)</b>  | <b>9.91</b>        |
| <b>44193</b> | <b>M</b>   | <b>04/06/2014<br/>(6yrs)</b>  | <b>9.16</b>        |
| <b>44639</b> | <b>M</b>   | <b>05/28/2014<br/>(6yrs)</b>  | <b>12.95</b>       |
| <b>44876</b> | <b>F</b>   | <b>05/11/2015<br/>(6yrs)</b>  | <b>10.38</b>       |
| <b>45513</b> | <b>M</b>   | <b>06/22/2015<br/>(6yrs)</b>  | <b>8.43</b>        |

528



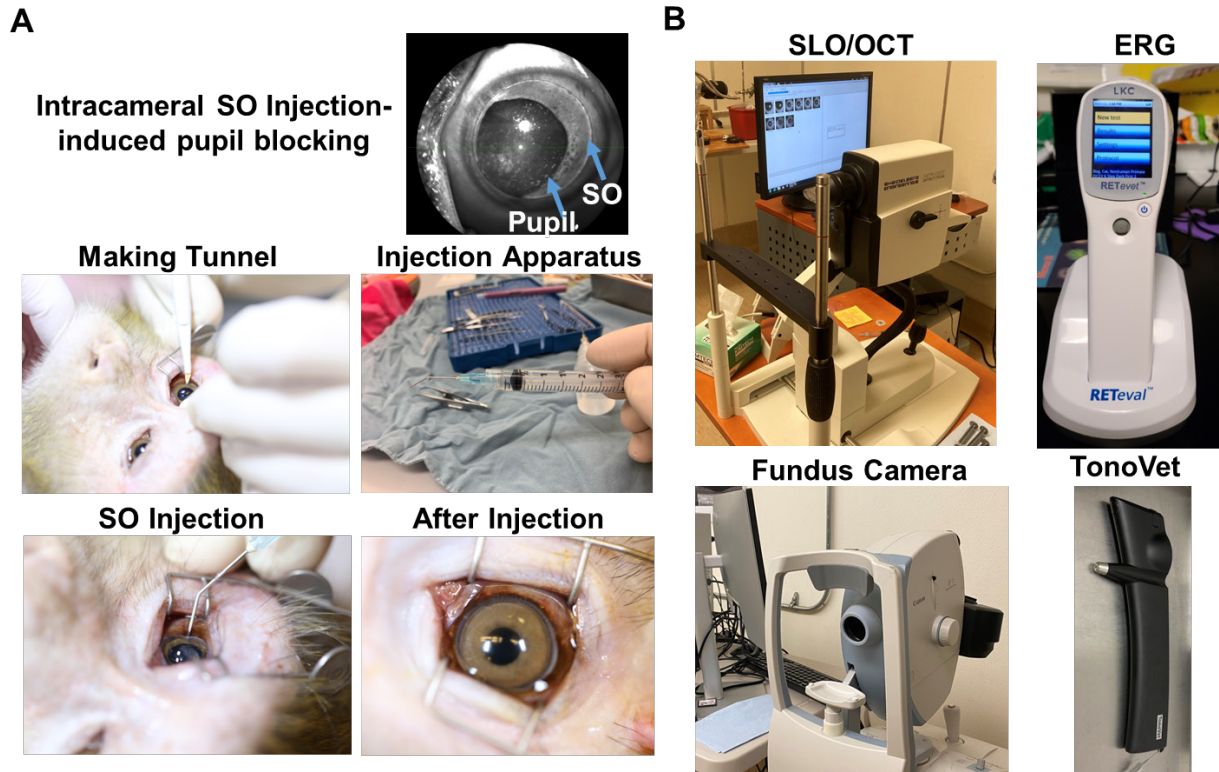

529

530

531 **Figure 1. Intracameral SO injection and in vivo assays of rhesus macaque monkey eyes. (A)**

532 The procedures of SO intracameral injection in monkey eye. **(B)** The equipment used for in vivo

533 assays, including SLO/OCT, ERG, fundus imaging, and TonoVet for IOP measurement.

534



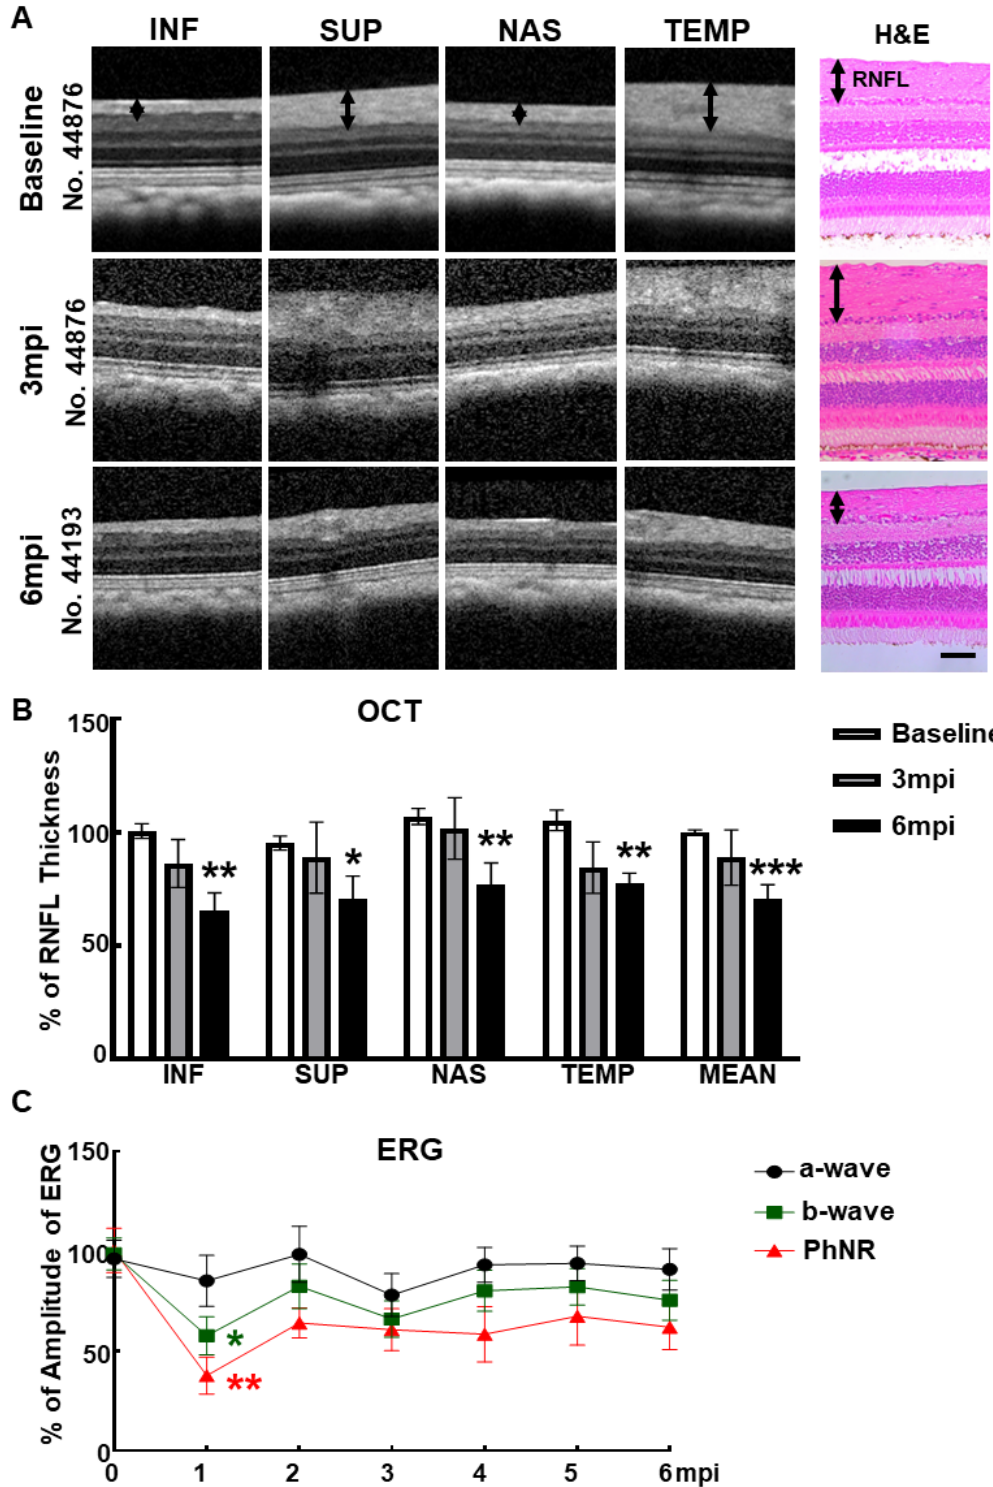

535

536 **Figure 2. Visual function and morphological deficits of SOHU monkey eyes. (A)** Longitudinal

537 SD-OCT imaging of SOHU retinas at inferior (I), superior (S), nasal (N), and temple (T) quadrants;

538 and the H&E staining of retina sections. **(B)** Measurements of RNFL thickness at different time

539 points, represented as percentage of SOHU eyes compared to CL eyes. Data are presented as means  
540  $\pm$  s.e.m, n = 6 for 3mpi and n = 4 for 6mpi, \*:  $P < 0.05$ , \*\*:  $P < 0.01$ , \*\*\*:  $P < 0.001$ , Student's t test.  
541 (C) Longitudinal ERG recording of macaque eyes at different time points after SO injection and  
542 the measurements of the amplitudes of a wave, b wave and PhNR, represented as percentage of  
543 the amplitudes in the SOHU eyes, compared to the CL eyes. Data are presented as means  $\pm$  s.e.m,  
544 n = 6 for 1-3mpi and n = 4 for 4-6mpi, \*:  $P < 0.05$ , \*\*:  $P < 0.01$ , One-way ANOVA with Tukey's  
545 multiple comparison test.

546

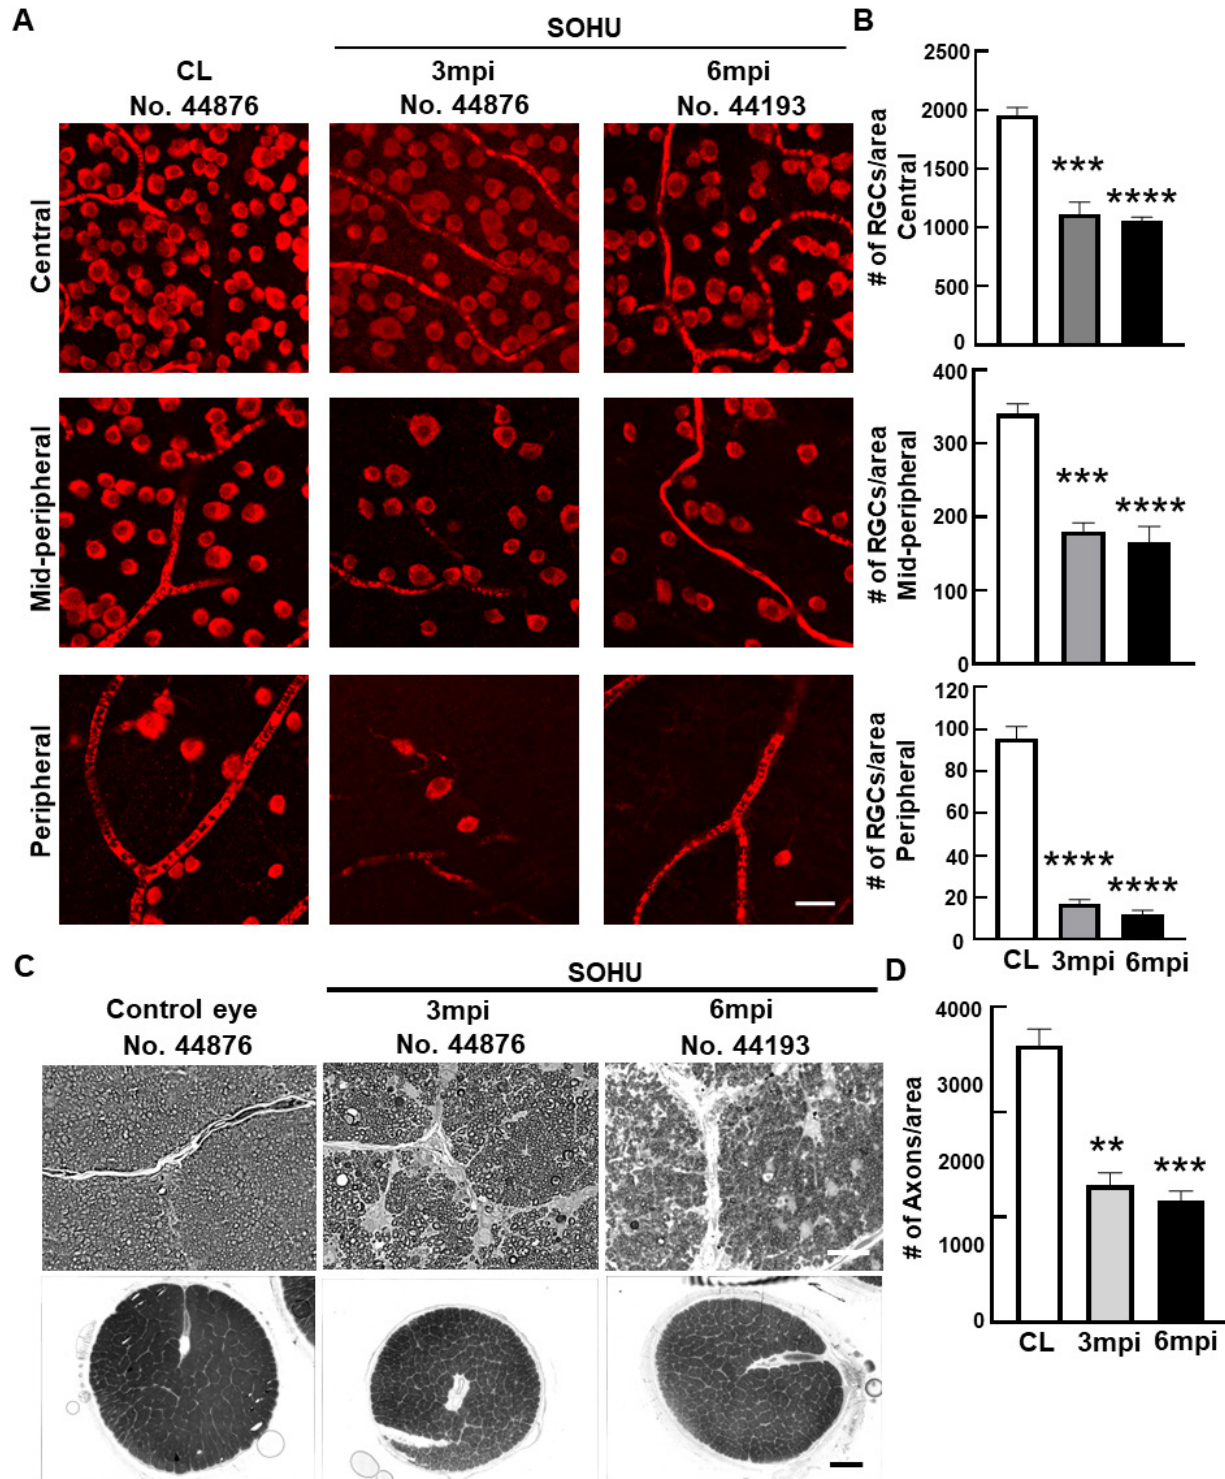

547  
548  
549

**Figure 3. Severe RGC and ON degeneration in SOHU eyes at 3mpi and 6mpi. (A)** Confocal

550 images of wholemount retinas showing surviving RBPMS-positive (red) RGCs in the peripheral,

551 mid-peripheral, and central retina at 3 and 6 mpi. Scale bar, 20  $\mu$ m. **(B)** Quantification of surviving

552 RGCs in the peripheral, mid-peripheral, and central retina. CL: contralateral control eyes. Data are  
553 presented as means  $\pm$  s.e.m, n = 2 for 3mpi and n = 4 for 6mpi, \*\*\*:  $P < 0.001$ , \*\*\*\*:  $P < 0.0001$ ,  
554 one-way ANOVA with Tukey's multiple comparison test. (C) Light microscope images of semi-  
555 thin transverse sections of ON stained with PPD in the corresponding groups. Upper panel: 100 x,  
556 Scale bar, 20  $\mu\text{m}$ ; lower panel: 60 x, Scale bar, 500  $\mu\text{m}$ . (D) Quantification of surviving RGC  
557 axons in ON. Data are presented as means  $\pm$  s.e.m, n = 2 for 3mpi and n = 4 for 6mpi, \*\*:  $P < 0.01$ ,  
558 \*\*\*:  $P < 0.001$ , One-way ANOVA with Tukey's multiple comparison test.

559

560

A

IOP measurement (mmHg)

| SOHU                       | 44876 |    | 45513           |    | 42946 |    | 44639 |    | 44193 |    | 38361 |    |
|----------------------------|-------|----|-----------------|----|-------|----|-------|----|-------|----|-------|----|
|                            | SOHU  | CL | SOHU            | CL | SOHU  | CL | SOHU  | CL | SOHU  | CL | SOHU  | CL |
| Pre-Injection              | 15    | 18 | 13              | 12 | 9     | 9  | 13    | 12 | 11    | 14 | 17    | 16 |
| Post-injection immediately | 19    | 18 | 22              | 11 | 11    | 9  | 11    | 12 | 9     | 14 |       |    |
| 1mpi                       | 4     | 16 | Too low to read | 14 | 6     | 11 | 8     | 17 | 5     | 11 | 11    | 19 |
| 2mpi                       | 3     | 16 | 3               | 12 | 9     | 9  | 8     | 12 | 10    | 14 |       |    |
| 3mpi                       | 2     | 11 | 3               | 11 | 8     | 9  | 8     | 16 | 12    | 14 | 49    | 18 |
| 4mpi                       |       |    |                 |    | 12    | 10 | 9     | 13 | 13    | 15 |       |    |
| 5mpi                       |       |    |                 |    | 9     | 6  | 8     | 12 | 12    | 11 | 36    | 18 |
| SO removal                 |       |    |                 |    |       |    |       |    |       |    | 9     | 19 |
| 6mpi                       |       |    |                 |    | 12    | 14 | 10    | 12 | 13    | 14 | 15    | 17 |

B

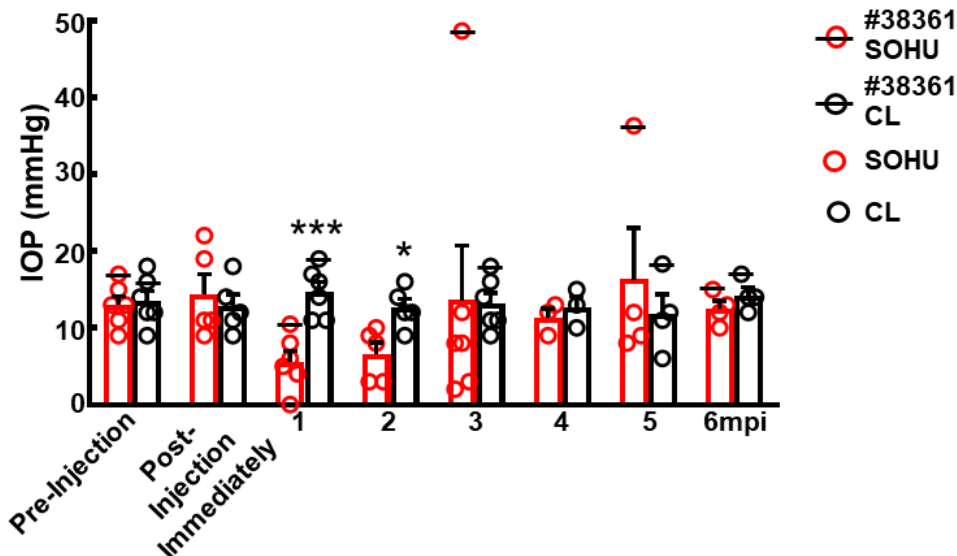

561

562 **Figure 4. Dynamic IOP changes of SOHU eyes.** Table (A) and Bar graph (B) presentation of  
 563 longitudinal IOP measurements of experimental (SOHU) eyes and contralateral control (CL) eyes  
 564 at different time points after SO injection. mpi: month post injection. Data are presented as means  
 565  $\pm$  s.e.m, n = 6 (1-3mpi) and n = 4 (4-6mpi) of each group; \*: p<0.05, \*\*\*: p<0.001, Student's t  
 566 test. Red numbers are ocular hypotension and green numbers are ocular hypertension.

567



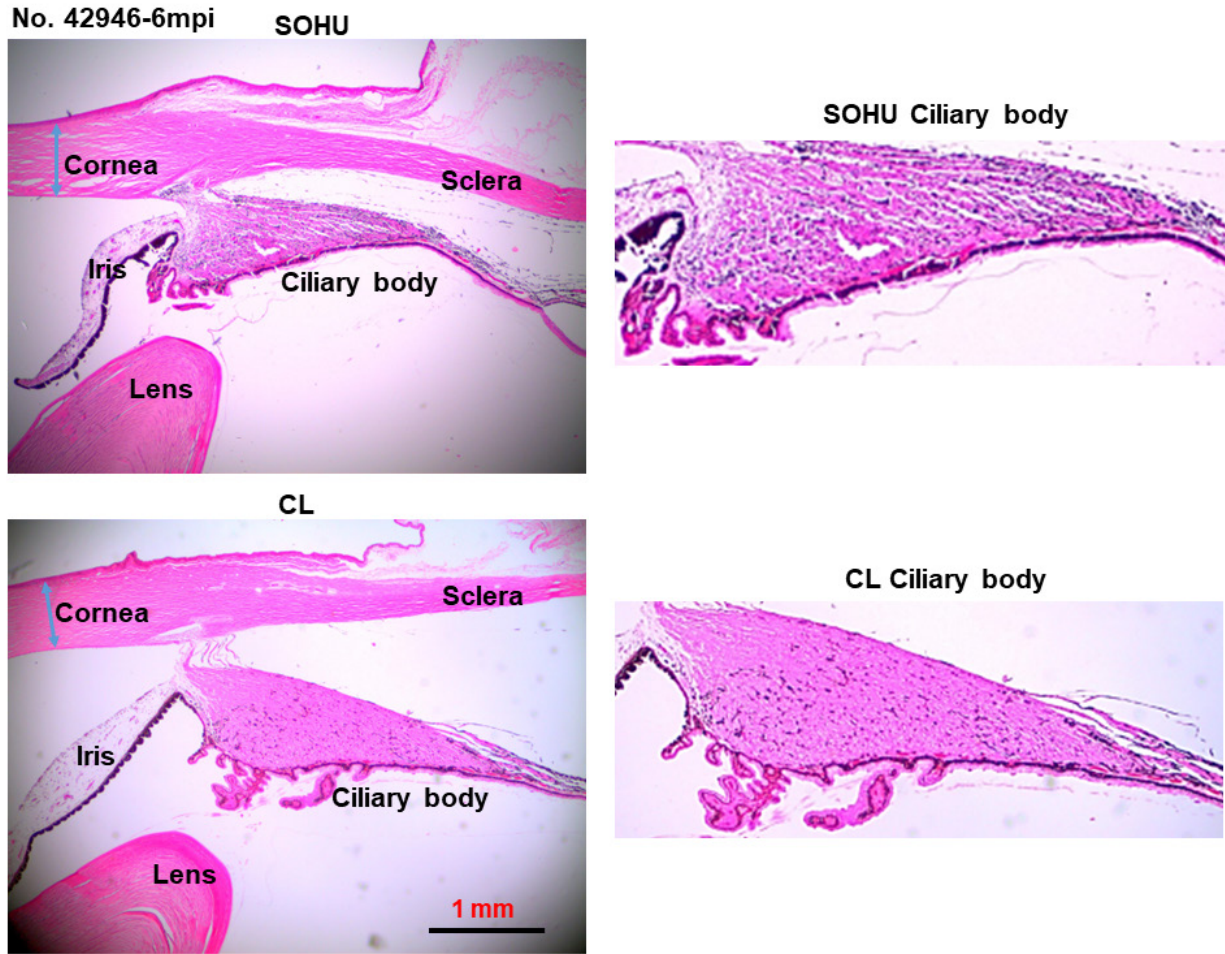

568

569

570

571 **Figure 5. Ciliary body atrophy in SOHU eyes at 6mpi.** Anterior chamber sections stained with

572 H&E and imaged with 2x lens; and enlarged images of ciliary body, showing loose arrangement,

573 larger interfibrous areas, and increased cellular invasion in muscle fibers.

574

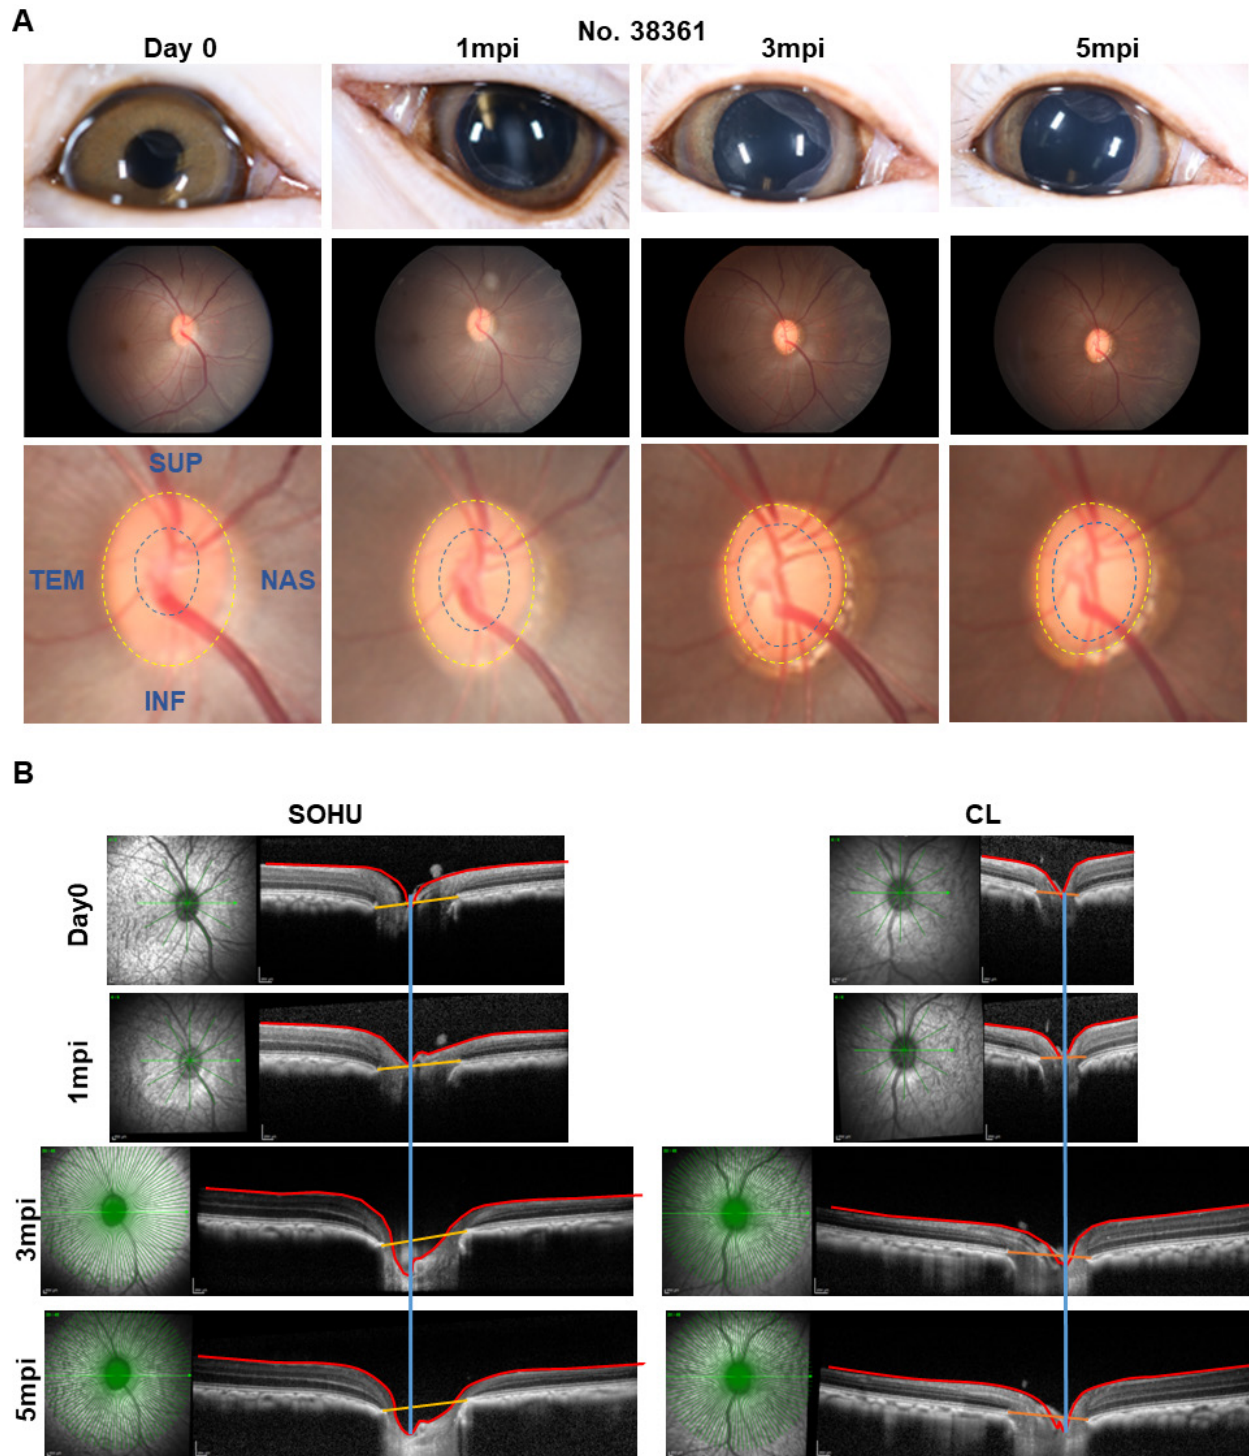

575  
576

577 **Figure 6. ONH “cupping” in animal #38361 associated with IOP elevation. (A)** The retinal  
578 fundus images of the SOHU eye before and after SO injection. Yellow dotted line outlines the  
579 optic disc; blue dotted line outlines optic cup. **(B)** Longitudinal SD-OCT imaging of macaque ON

580 head with 48 radial B-scans acquired over a 30° area at 768 A-scans per B-scan, ART=16  
581 repetitions.  
582
